# Supplementary material for: The Effect of Different Electric Toothbrush Technologies on Interdental Plaque Removal: A Systematic Review with a Meta-Analysis
Source: MDPI journal article supplement (doi:10.3390/healthcare12101035), 2024-05-16
Supplement: s1 [file s1]

**Table S1:****Cohen's Kappa Agreement Scores**

Title screening = 0.94

Abstract screening = 0.89

Full-text screening = 0.92

**Excluded studies from manual search**

| Paper                                                                                                                                                                                                                                                                                 | Reason for exclusion (if applicable)  |
|---------------------------------------------------------------------------------------------------------------------------------------------------------------------------------------------------------------------------------------------------------------------------------------|---------------------------------------|
| Williams K, Rapley K, Huan J, Walters P, He T, Grender J, Biesbrock AR. A study comparing the plaque removal efficacy of an advanced rotation-oscillation power toothbrush to a new sonic toothbrush. <i>The Journal of Clinical Dentistry</i> . 2008 Jan 1;19(4):154-8.              | No interproximal plaque outcome       |
| Williams K, Rapley KA, Haun J, Walters P, He T, Grender J, Biesbrock AR. Comparison of rotation/oscillation and sonic power toothbrushes on plaque and gingivitis for 10 weeks. <i>American Journal of Dentistry</i> . 2009 Dec 1;22(6):345.                                          | No interproximal plaque outcome       |
| Goyal CR, Qaqish J, He T, Grender J, Walters P, Biesbrock AR. A randomized 12-week study to compare the gingivitis and plaque reduction benefits of a rotation-oscillation power toothbrush and a sonic power toothbrush. <i>Journal of Clinical Dentistry</i> . 2009 Jan 1;20(3):93. | No interproximal plaque outcome       |
| Sharma NC, Qaqish JG, Klukowska MA, Rooney J, Grender JM, Hoke P, Cunningham P. Plaque removal by oscillating-rotating power toothbrush and manual toothbrush. <i>J Dent Res</i> . 2010;89.                                                                                           | No sonic toothbrush                   |
| Buechel B, Reise M, Klukowska M, Grender J, Timm H, Ccahuana-Vasquez RA, Sigusch BW. A 4-week clinical comparison of an oscillating-rotating power brush versus a marketed sonic brush in reducing dental plaque. <i>American Journal of Dentistry</i> . 2014 Feb 1;27(1):56-60.      | Sonic toothbrush is multi-directional |
